# Supplementary material for: Triple-Isotope Tracing for Pathway Discernment of NMN-Induced NAD+ Biosynthesis in Whole Mice
Source: MDPI journal article supplement (doi:10.3390/ijms241311114), 2023-07-05
Supplement: s1 [file s1]

**Preparation of  $^{13}\text{C}$ -labeled ribofuranose tetraacetate**

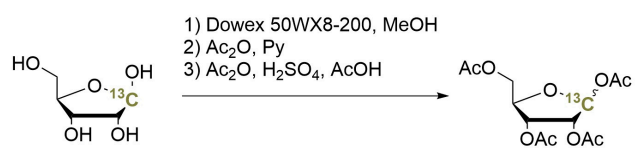

**Preparation of  $^{18}\text{O}$ -labeled nicotinamide**

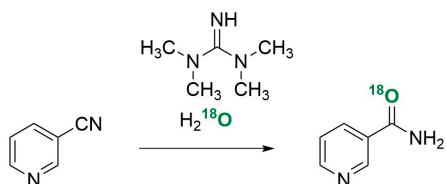

**Preparation of isotope-labeled NMN**

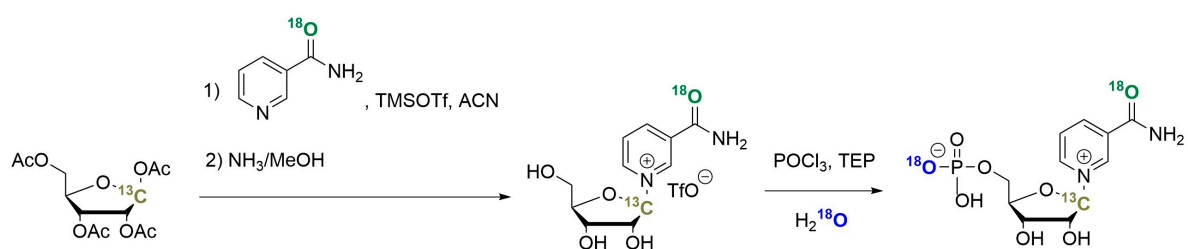

**Scheme S1.** Synthesis of [ $^{18}\text{O}$ -phosphoryl- $^{18}\text{O}$ -carbonyl- $^{13}\text{C}$ -1-ribosyl] NMN.
